# Supplementary material
Source: Elsevier journal article supplement (https://www.sciencedirect.com/science/article/pii/S0213911112001872)
Supplement: mmc1 [file S0213911112001872:mmc1.doc]

**Appendix**

Table A of this annex lists the major changes that emerged from the results of the pilot phase.

**Results of item analysis of the PCAT-Facility questionnaire, Spanish and Catalan versions**

Table B of this annex shows the results per item. The numbering of the original questionnaire in English has been maintained. Items added in the Spanish and Catalan versions are identified with ‘n’ (*new*) after the corresponding number. The letter ‘m’ marks those that were *modified* from the English version.

The highest non-response rate was 6% (items J20 and J21), which was not considered high, since most items had a very low non-response rate (<4%). When analyzing the variability of the responses to each of the items, we found four (G1, G2, G24, and H7), all under the Comprehensiveness domain, with a standard deviation of < 0.225, equivalent to a variability of less than 10%.

When checking Likert scaling assumptions, we observed the following: 1) Good results in the corrected item-total correlation in 108 of 129 items. In those for which the correlation was < 0.20, notably, 5 of the 8 items were in Access, 1 was in Continuity or Ongoing Care (D1n), 1 was in Coordination (E9), and 8 were among the 27 items of Comprehensiveness - services available (G1, G3, G7, G12n, G22, G24, G26n, G27n and G28n). 2) In the analysis of discriminant validity, the correlation of each item with its dimension was greater than that with the other dimensions for all items except 6 (C4, D4, E12, F6, G19 and G23) of the 129. 3) The item-scale correlations covered a wide range in the dimensions of Access (0.06-0.67), Continuity (0.16-0.61), Comprehensiveness - services available (0- 0.53), and Community Focus (0.20 – 0.65). 4) Finally, as stated in the article, the Cronbach’s alpha coefficient was very good, > 0.80, in the dimensions of Continuity, Comprehensiveness-Services Provided, Family and Community Focus, and Cultural Competence. Comprehensiveness showed an acceptable 0.70, and Services Available, 0.79. Access and Coordination were both < 0.70.

In the item analysis, when calculating the modification of Cronbach’s alpha with the exclusion of each item, we observed the following:

- - - - In Accessibility, the coefficient falls when three items (C1n2, C6 and C7) are removed. For the remaining items, the coefficient either stays the same or rises slightly upon removal.
      - In Continuity, the coefficient does not vary upon removal of any item.
      - In Coordination, removing E9 leads to a rise of < 3%, while the removal of any one of the other items results in a drop of between 3 and 10%.
      - In Coordination-information systems, the exclusion of each item lowers the coefficient by between 3.1 and 11 %.
      - In Comprehensiveness, no significant variations in Cronbach’s alpha resulted from the removal of any item in Available Services or Services Provided, nor did removal of any item in Family and Community Focus affect the coefficient.

For the analysis of internal consistency, Pearson’s item-total correlation was calculated (corrected without the item). Correlations < 0.30 were observed in the following cases:

- - - - In Access, C1n1, C3, C4, C8 and C9 had very low correlations, each being < 0.15.
      - In Ongoing Care, D1 and D1n correlations were 0.25 and 0.16, respectively.
      - In Coordination, the correlation for E9 was 0.09 and those for E10 and E12n were both 0. 25. For Coordination-information systems, the correlation was never < 0.30 for any item.
      - The dimension for which the greatest number of items showed problems of low correlations was Comprehensiveness–services available, in which 15 of 27 items had correlations of < 0.30. Of these, 10 were < 0.20 (G1, G3, G7, G10, G12m, G22, G24, G26n, G27n and G28n), and 5 fell between 0.20 and 0.30 (G2, G8, G11, G14 and G23).
      - For the remaining dimensions, only one item, J1 in Community Focus, had a correlation of < 0.30 (the value was 0.20).

Table A. Changes made after the pilot phase.

| Parts of the questionnaire | Changes |
| --- | --- |
| General and Others | It was noted that questions admitting multiple responses would have worked better as a series of independent Yes/No questions. |
| Options were added under ‘Others’ |
| Reminders were added, e.g. ‘Mark one option only’. |
| Filter questions were added. |
| A redundant question on the average of daily/weekly visits was eliminated. |
| Domains | Elimination of some items that had been newly included in the Spanish version. |
| Elimination of C5 of the original version because it referred to an offer given by the system (assistance by telephone) and F3 because 100% of responses were the same. |
| Modification of certain new items in the Spanish version. |
| Inclusion of a new response option to cover all answers (Item C7 - ‘Does not apply / Not applicable’ for those centers that do not close any day of the week). |
| Change of heading for J9 from ‘clinical data of your center’ to ‘data from clinical histories’. |

Table B. Item analysis PCAT- Facility Spanish version.

|  | **Ítem** | **Non- response**  **(%)** | **No, en absoluto**  *Definitely not*  **(%)** | **Es probable que no**  *Probably not*  **(%)** | **Es probable que sí**  *Probably yes*  **(%)** | **Si, sin duda**  *Yes, absolutely*  **(%)** | **Mean** | **SD** | **% Variability** | **Corrected item-total correlation** | **Correlation with other attributes** | **Alpha without the item** |  | |
| --- | --- | --- | --- | --- | --- | --- | --- | --- | --- | --- | --- | --- | --- | --- |
|  | ACCESO  /  *FIRST CONTACT – ACCESS* |  |  |  |  |  |  |  |  |  |  |  |  | |
| **C1n1.** | ¿Su centro está abierto todos los sábados del año? | 0,00 | 9,77 | 2,26 | 9,02 | 78,95 | 3,57 | 0,94 | 63 % | 0,07 | - | 0,65 |  | |
| **C1n2.** | ¿Su centro está abierto todos los domingos del año? | 1,50 | 69,92 | 0,75 | 0,00 | 27,82 | 1,85 | 1,35 | 90 % | 0,67 | - | 0,44 |  | |
| **C3.** | Cuando su centro está abierto y los pacientes se ponen enfermos, ¿Hay alguien del centro que los visite ese mismo día? | 0,75 | 0,75 | 0,00 | 6,77 | 91,73 | 3,91 | 0,36 | 24 % | 0,13 | - | 0,62 |  | |
| **C4.** | Cuando su centro está abierto, ¿los pacientes pueden hacer consultas rápidas por teléfono si lo necesitan? | 0,00 | 0,00 | 3,76 | 26,32 | 69,92 | 3,66 | 0,55 | 37 % | 0,09 | E (a=0,50) | 0,63 |  | |
| **C6.** | Cuando su centro está cerrado los sábados y /o domingos, y los pacientes se ponen enfermos, ¿alguien del centro podría visitarlos ese mismo día? | 0,75 | 51,88 | 3,76 | 3,76 | 39,85 | 2,32 | 1,44 | 96 % | 0,67 | - | 0,43 |  | |
|  | No aplicable, mi centro esta siempre abierto |  |  |  |  |  |  |  |  |  |  |  |  | |
| **C7.** | Cuando su centro está cerrado por la noche y los pacientes se ponen enfermos, ¿alguien del centro podría visitarlos esa misma noche? | 0,75 | 57,14 | 1,50 | 2,26 | 38,35 | 2,22 | 1,45 | 97 % | 0,67 | - | 0,43 |  | |
|  | No aplicable, mi centro esta siempre abierto |  |  |  |  |  |  |  |  |  |  |  |  | |
| **C8.** | ¿En su centro, los pacientes pueden concertar hora fácilmente para las visitas no urgentes? | 0,00 | 0,00 | 1,50 | 29,32 | 69,17 | 3,68 | 0,50 | 33 % | 0,06 | - | 0,63 | |  |
| **C9.** | De media, ¿los pacientes tienen que esperar más de 30 minutos desde que llegan hasta que el / la médico /a o el /la enfermero /a los visita? | 0,75 | 15,00 | 51,10 | 33,10 | 0,00 | 2,82 | 0,67 | 45 % | -0,05 | - | 0,66 | |  |
|  | CONTINUIDAD/ ONGOING CARE |  |  |  |  |  |  |  |  |  |  |  | |  |
| **D1.** | En su EAP, ¿a los pacientes les atiende el /la mismo /a médico /a cada vez que se visitan? | 2,26 | 0,00 | 3,01 | 69,92 | 24,81 | 3,22 | 0,49 | 33 % | 0,25 | - | 0,83 | |  |
| **D1n.** | ¿A los pacientes crónicos de su EAP que reciben atención domiciliaria, les atiende el mismo médico /a o enfermero /a cada vez que se visitan? | 0,00 | 0,00 | 2,26 | 48,12 | 49,62 | 3,47 | 0,54 | 36 % | 0,16 | - | 0,83 | |  |
| **D2.** | ¿A los médicos de su EAP les es difícil entender las preguntas que les realizan los pacientes? [NO tenga en cuenta los problemas de idioma, en este apartado nos referimos a problemas de comunicación en la misma lengua] | 3,76 | 55,64 | 33,08 | 6,02 | 1,50 | 3,48 | 0,69 | 46 % | 0,37 | - | 0,82 | |  |
| **D3.** | ¿Cree usted que los pacientes de su EAP entienden lo que el médico les pregunta o les dice? [NO tenga en cuenta los problemas de idioma, en este apartado nos referimos a problemas de comunicación en la misma lengua] | 0,00 | 0,75 | 3,01 | 73,68 | 22,56 | 3,18 | 0,51 | 34,0 | 0,46 | - | 0,81 | | |

|  | **Item** | **Non- response**  **(%)** | **No, en absoluto**  *Definitely not*  **(%)** | **Es probable que no**  *Probably not*  **(%)** | **Es probable que sí**  *Probably yes*  **(%)** | **Si, sin duda**  *Yes, absolutely*  **(%)** | **Mean** | **SD** | **% Variability** | **Corrected item-total correlation** | **Correlation with other attributes** | **Alpha without the item** |
| --- | --- | --- | --- | --- | --- | --- | --- | --- | --- | --- | --- | --- |
| **D4.** | Si los pacientes tienen una pregunta, ¿pueden llamar y hablar con el /la médico /a o el /la enfermero /a que mejor los conoce? | 3,01 | 0,00 | 2,26 | 32,33 | 62,41 | 3,62 | 0,53 | 35,3 | 0,40 | E (a=0,52)  I (a=0,41) | 0,82 |
| **D5.** | ¿Cree que los médicos dejan suficiente tiempo a los pacientes para que hablen de sus preocupaciones o problemas? | 1,50 | 3,76 | 21,80 | 54,89 | 18,05 | 2,89 | 0,74 | 49,3 | 0,49 | - | 0,81 |
| **D6.** | ¿Cree que los pacientes se sienten cómodos cuando explican sus preocupaciones o problemas a los médicos? | 1,50 | 0,00 | 0,75 | 60,90 | 36,84 | 3,37 | 0,50 | 33,3 | 0,53 | - | 0,81 |
| **D7.** | ¿Los médicos conocen "muy bien" a los pacientes que se visitan en su centro? | 1,50 | 0,00 | 2,26 | 58,65 | 37,59 | 3,36 | 0,53 | 35,3 | 0,53 | - | 0,81 |
| **D8.** | ¿Los médicos saben con quién vive cada paciente? | 2,26 | 0,75 | 17,29 | 69,17 | 10,53 | 2,92 | 0,56 | 37,3 | 0,51 | - | 0,81 |
| **D9.** | ¿Los médicos saben qué problemas son más importantes para los pacientes que visitan? | 1,50 | 0,00 | 3,01 | 69,92 | 25,56 | 3,23 | 0,49 | 32,7 | 0,56 | - | 0,81 |
| **D10.** | ¿Cree que los médicos conocen los antecedentes médicos completos de cada paciente? | 0,00 | 0,00 | 8,27 | 60,15 | 31,58 | 3,23 | 0,59 | 39,3 | 0,61 | - | 0,80 |
| **D11.** | ¿Cree que los médicos conocen el trabajo o empleo de cada paciente? | 2,26 | 0,00 | 41,35 | 51,13 | 5,26 | 2,63 | 0,59 | 39,3 | 0,58 | E (a=0,41)  I (a=0,42) | 0,80 |
| **D12.** | ¿Los médicos sabrían si los pacientes tienen problemas para conseguir o pagar una medicación recetada? | 1,50 | 0,00 | 27,82 | 61,65 | 9,02 | 2,81 | 0,58 | 38,7 | 0,50 | - | 0,81 |
| **D13.** | ¿Los médicos saben *todos* los medicamentos que toman sus pacientes? | 1,50 | 0,00 | 12,03 | 57,89 | 28,57 | 3,17 | 0,62 | 41,3 | 0,45 | - | 0,81 |
|  | COORDINACIÓN / COORDINATION |  |  |  |  |  |  |  |  |  |  |  |
| **E1.** | ¿Su centro comunica por teléfono o envía a sus pacientes los resultados de los análisis, o bien les ofrece la posibilidad de hacerlo? | 0,00 | 32,33 | 23,31 | 27,07 | 17,29 | 2,29 | 1,10 | 73,3 | 0,31 | - | 0,56 |
| **E7.** | ¿Cree que los médicos están al corriente de todas las visitas a especialistas (públicos y privados) de sus pacientes o las pruebas complementarias que se hacen? | 0,75 | 0,75 | 36,09 | 56,39 | 6,02 | 2,68 | 0,60 | 40,0 | 0,37 | - | 0,54 |
| **E7n.** | ¿Cree que los médicos están al corriente de todas las visitas a urgencias de sus pacientes? | 0,75 | 0,75 | 36,09 | 55,64 | 6,77 | 2,69 | 0,61 | 40,7 | 0,40 | - | 0,53 |
| **E8.** | Cuando hay que derivar a un especialista, ¿los médicos comentan con el paciente los distintos sitios a donde puede ir? | 2,26 | 5,26 | 30,08 | 45,86 | 16,54 | 2,75 | 0,80 | 53,3 | 0,30 | - | 0,55 |
| **E9.** | ¿Hay alguien en su centro que ayude al paciente a concertar una visita con el especialista? | 1,50 | 2,26 | 8,27 | 37,59 | 50,38 | 3,38 | 0,74 | 49,3 | 0,09 | - | 0,61 |
| **E10.** | Cuando se deriva a los pacientes al especialista, ¿los médicos les proporcionan alguna información escrita para el especialista? | 0,00 | 0,00 | 0,00 | 12,03 | 87,97 | 3,88 | 0,33 | 22,0 | 0,26 | - | 0,57 |
| **E11.** | ¿Los médicos reciben información útil sobre los pacientes que han derivado cuando vuelven del especialista o de las pruebas complementarias? | 3,01 | 8,27 | 48,87 | 36,09 | 3,76 | 2,36 | 0,70 | 46,7 | 0,35 | - | 0,54 |

|  | **Item** | **Non- response**  **(%)** | **No, en absoluto**  *Definitely not*  **(%)** | **Es probable que no**  *Probably not*  **(%)** | **Es probable que sí**  *Probably yes*  **(%)** | **Si, sin duda**  *Yes, absolutely*  **(%)** | **Mean** | **SD** | **% Variability** | | **Corrected item-total correlation** | **Correlation with other attributes** | **Alpha without the item** | | |
| --- | --- | --- | --- | --- | --- | --- | --- | --- | --- | --- | --- | --- | --- | --- | --- |
| **E12.** | Después de la derivación, ¿los médicos hablan con los pacientes sobre los resultados de la(s) visita(s) con el especialista o de las pruebas complementarias? | 0,00 | 0,00 | 4,51 | 61,65 | 33,83 | 3,29 | 0,55 | 36,7 | | 0,31 | D(a=0,48) | 0,56 | | |
| **E12n.** | ¿En su EAP se han consensuado criterios terapéuticos con los servicios especializados de referencia? | 4,51 | 11,28 | 24,06 | 37,59 | 22,56 | 2,75 | 0,95 | 63,3 | | 0,27 | - | 0,57 | | |
| **E13n.** | ¿En relación a qué procesos? |  |  |  |  |  |  |  |  | |  |  |  | | |
|  | **COORDINACIÓN (SISTEMAS DE INFORMACIÓN) /**  **COORDINATION (INFORMATION SYSTEMS)** |  |  |  |  |  |  |  |  | |  |  |  | | |
| **F2.** | ¿Su EAP permite que los pacientes vean sus historias clínicas si lo desean? | 1,50 | 5,26 | 14,29 | 34,59 | 44,36 | 3,20 | 0,88 | 58,7 | | 0,39 | - | 0,61 | | |
| **F2n.** | ¿Los pacientes pueden obtener todo el contenido de la historia clínica? | 0,75 | 3,76 | 16,54 | 26,32 | 52,63 | 3,29 | 0,88 | 58,7 | | 0,36 | - | 0,62 | | |
| **¿Su EAP utiliza los siguientes medios para garantizar que se dan los servicios adecuados?** | | | | | | | | | | | | | | |  |
| **F4.** | Gráficas en las historias clínicas con los resultados de laboratorio | 2,26 | 10,53 | 9,02 | 19,55 | 58,65 | 3,29 | 1,02 | 68,0 | | 0,33 | - | 0,63 | | |
| **F5.** | Guías y/ o protocolos impresos en las historias clínicas | 1,50 | 8,27 | 12,03 | 22,56 | 55,64 | 3,27 | 0,98 | 65,3 | | 0,46 | - | 0,58 | | |
| **F6.** | Revisiones periódicas de las historias clínicas para hacer una evaluación longitudinal de los pacientes | 3,76 | 9,77 | 30,08 | 30,08 | 26,32 | 2,76 | 0,97 | 64,7 | | 0,39 | J (a=0,41) | 0,61 | | |
| **F7.** | Listados de problemas en las historias clínicas | 2,26 | 0,00 | 2,26 | 18,80 | 76,69 | 3,76 | 0,48 | 32,0 | | 0,36 | - | 0,63 | | |
| **F8.** | Listados de medicaciones en las historias clínicas | 1,50 | 0,00 | 0,75 | 14,29 | 83,46 | 3,84 | 0,39 | 26,0 | | 0,37 | - | 0,63 | | |
| **F9** | Otros. Por favor, especifique |  |  |  |  |  |  |  |  | |  |  |  | | |
|  | **GLOBALIDAD (SERVICIOS DISPONIBLES)/**  **COMPREHENSIVENESS (AVAILABLE SERVICES)** |  |  |  |  |  |  |  |  | |  |  |  | | |
| **Si los pacientes necesitan alguno de los siguientes servicios, ¿podrían recibirlos en su mismo centro?** | | | | | | | | | | | | | |  | |
| **G1.** | Consejos de alimentación | 0,00 | 0,00 | 0,00 | 3,76 | 96,24 | 3,96 | 0,19 | 12,7 | | 0,00 | - | 0,74 | | |
| **G2.** | Vacunaciones | 1,50 | 0,00 | 0,00 | 1,50 | 96,99 | 3,98 | 0,12 | 8,0 | | 0,21 | - | 0,74 | | |
| **G3.** | Valoración de necesidad de acceder a programas o prestaciones sociales | 0,00 | 0,00 | 0,75 | 8,27 | 90,98 | 3,90 | 0,32 | 21,3 | | 0,11 | - | 0,74 | | |
| **G4.** | Revisiones odontológicas | 0,75 | 5,26 | 3,76 | 5,26 | 84,96 | 3,71 | 0,78 | 52,0 | | 0,48 | - | 0,72 | | |
| **G5.** | Tratamientos odontológicos | 1,50 | 6,02 | 7,52 | 16,54 | 68,42 | 3,50 | 0,88 | | 58,7 | 0,35 | - | 0,73 | |  |
| **G6.** | Planificación familiar o servicios de control de natalidad | 1,50 | 15,04 | 14,29 | 9,77 | 59,40 | 3,15 | 1,16 | | 77,3 | 0,53 | - | 0,71 | |  |
| **G7.** | Asesoramiento o tratamiento de toxicomanía y drogadicción | 1,50 | 18,80 | 24,06 | 30,83 | 24,81 | 2,63 | 1,06 | | 70,7 | 0,17 | - | 0,74 | |  |
| **G8.** | Asesoramiento para problemas de salud mental o de conducta | 0,75 | 5,26 | 3,76 | 30,08 | 60,15 | 3,46 | 0,80 | | 53,3 | 0,24 | - | 0,74 | |  |
| **G10.** | Sutura de heridas leves | 0,00 | 0,00 | 3,76 | 15,79 | 80,45 | 3,77 | 0,51 | | 34,0 | 0,27 | - | 0,74 | |  |
| **G11.** | Asesoramiento y pruebas de VIH /SIDA | 0,00 | 0,00 | 2,26 | 9,77 | 87,97 | 3,86 | 0,41 | | 27,3 | 0,23 | - | 0,74 | |  |

|  | **Item** | **Non- response**  **(%)** | **No, en absoluto**  *Definitely not*  **(%)** | **Es probable que no**  *Probably not*  **(%)** | **Es probable que sí**  *Probably yes*  **(%)** | **Si, sin duda**  *Yes, absolutely*  **(%)** | **Mean** | **SD** | | **% Variability** | | | **Corrected item-total correlation** | **Correlation with other attributes** | | | **Alpha without the item** | | |  |
| --- | --- | --- | --- | --- | --- | --- | --- | --- | --- | --- | --- | --- | --- | --- | --- | --- | --- | --- | --- | --- |
| **G12m** | Extracción de tapones de cera | 0,00 | 3,01 | 5,26 | 8,27 | 83,46 | 3,72 | 0,70 | | | 46,7 | | 0,19 | - | | | 0,74 |  | | |
| **G13.** | Cribaje de problemas de visión | 0,75 | 12,03 | 30,83 | 21,80 | 34,59 | 2,80 | 1,05 | | | 70,0 | | 0,48 | - | | | 0,72 |  | | |
| **G14.** | Pruebas de alergia | 3,76 | 68,42 | 13,53 | 7,52 | 6,77 | 1,51 | 0,91 | | | 60,7 | | 0,27 | - | | | 0,74 |  | | |
| **G15.** | Inmovilización de un tobillo con esguince | 0,00 | 1,50 | 0,75 | 15,04 | 82,71 | 3,79 | 0,52 | | | 34,7 | | 0,34 | - | | | 0,73 |  | | |
| **G16.** | Extracción de verrugas | 2,26 | 24,81 | 19,55 | 15,04 | 38,35 | 2,68 | 1,23 | | | 82,0 | | 0,48 | - | | | 0,72 |  | | |
| **G17.** | Citología vaginal | 3,01 | 30,08 | 5,26 | 6,77 | 54,89 | 2,89 | 1,36 | | | 90,7 | | 0,42 | - | | | 0,72 |  | | |
| **G18.** | Tacto rectal | 0,00 | 0,00 | 1,50 | 18,80 | 79,70 | 3,78 | 0,45 | | | 30,0 | | 0,45 | - | | | 0,73 |  | | |
| **G19.** | Consejos para dejar de fumar | 0,75 | 0,00 | 0,00 | 7,52 | 91,73 | 3,92 | 0,27 | | | 18,0 | | 0,37 | H(a=0,42) | | | 0,74 |  | | |
| **G20.** | Atención prenatal | 2,26 | 21,05 | 7,52 | 9,77 | 59,40 | 3,10 | 1,24 | | | 82,7 | | 0,42 | - | | | 0,72 |  | | |
| **G21.** | Extirpación de una uña encarnada | 4,51 | 41,35 | 27,07 | 13,53 | 13,53 | 1,99 | 1,07 | | | 71,3 | | 0,33 | - | | | 0,73 |  | | |
| **G22.** | Asesoramiento sobre voluntades anticipadas | 0,75 | 0,00 | 3,01 | 30,08 | 66,17 | 3,64 | 0,54 | | | 36,0 | | 0,19 | - | | | 0,74 |  | | |
| **G23.** | Asesoramiento sobre adaptación a los cambios propios del envejecimiento | 1,50 | 0,75 | 0,75 | 27,82 | 69,17 | 3,68 | 0,53 | | | 35,3 | | 0,28 | H(a=0,47) I(a=0,49) J(a=0,44) | | | 0,74 |  | | |
| **G24.** | Atención de enfermería en el domicilio | 0,00 | 0,00 | 0,00 | 3,01 | 96,99 | 3,97 | 0,17 | | | 11,3 | | 0,14 | - | | | 0,74 |  | | |
| **G26n.** | Asesoramiento sobre consumo de alcohol | 0,00 | 0,00 | 0,00 | 15,79 | 84,21 | 3,84 | 0,37 | | | 24,7 | | 0,10 | - | | | 0,74 |  | | |
| **G27n.** | Control de Acenocumarol | 2,26 | 16,54 | 6,02 | 9,77 | 65,41 | 3,27 | 1,16 | | | 77,3 | | 0,02 | - | | | 0,76 |  | | |
| **G28n.** | Espirometría | 1,50 | 9,02 | 1,50 | 4,51 | 83,46 | 3,65 | 0,90 | | | 60,0 | | -0,04 | - | | | 0,76 |  | | |
| **G29n.** | Fondo de ojo en pacientes diabéticos | 3,01 | 39,85 | 19,55 | 8,27 | 29,32 | 2,28 | 1,28 | | | 85,3 | | 0,37 | - | | | 0,73 |  | | |
|  | **GLOBALIDAD (SERVICIOS PROPORCIONADOS) /**  **COMPREHENSIVENESS (SERVICES PROVIDED)** |  |  |  |  |  |  | |  | | |  |  | | |  |  | |  | |
| **Los temas siguientes se hablan con los pacientes?** | |  |  |  |  |  |  | |  | | |  |  | |  | |  | | | |
| **H1.** | Alimentación adecuada, horas de sueño necesarias | 0,00 | 0,00 | 0,00 | 20,30 | 79,70 | 3,80 | | 0,40 | | | 26,7 | 0,67 | I(a=0,45) | | | 0,93 | |  | |
| **H2.** | Seguridad en el hogar, cómo guardar los medicamentos en un lugar seguro | 0,00 | 0,75 | 5,26 | 29,32 | 64,66 | 3,58 | | 0,63 | | | 42,0 | 0,69 | I(a=0,54) | | | 0,92 | |  | |
| **H3.** | Uso del cinturón de seguridad | 3,01 | 3,76 | 24,81 | 30,08 | 38,35 | 3,06 | | 0,90 | | | 60,0 | 0,68 | - | | | 0,93 | |  | |
| **H4.** | Cómo tratar los conflictos familiares | 2,26 | 0,75 | 18,05 | 44,36 | 34,59 | 3,15 | | 0,74 | | | 49,3 | 0,71 | I(a=0,45) | | | 0,92 | |  | |
| **H5.** | Actividad física adecuada | 0,75 | 0,00 | 1,50 | 25,56 | 72,18 | 3,71 | | 0,49 | | | 32,7 | 0,70 | I(a=0,48) | | | 0,92 | |  | |
| **H6.** | Niveles de colesterol | 0,00 | 0,00 | 0,00 | 9,02 | 90,98 | 3,91 | | 0,29 | | | 19,3 | 0,41 | - | | | 0,93 | |  | |
| **H7.** | Fármacos que se toman | 0,75 | 0,00 | 0,00 | 6,02 | 93,23 | 3,94 | | 0,24 | | | 16,0 | 0,46 | - | | | 0,93 | |  | |
| **H8.** | Exposición a sustancias peligrosas en el hogar, en el trabajo o en el barrio | 1,50 | 2,26 | 19,55 | 42,11 | 34,59 | 3,11 | | 0,80 | | | 53,3 | 0,71 | I(a=0,42) | | | 0,92 | |  | |
| **H10.** | Prevención de quemaduras por agua caliente | 0,75 | 1,50 | 14,29 | 37,59 | 45,86 | 3,29 | | 0,77 | | | 51,3 | 0,71 | I(a=0,44) | | | 0,92 | |  | |

|  | **Item** | **Non- response**  **(%)** | **No, en absoluto**  *Definitely not*  **(%)** | **Es probable que no**  *Probably not*  **(%)** | **Es probable que sí**  *Probably yes*  **(%)** | **Si, sin duda**  *Yes, absolutely*  **(%)** | **Mean** | **SD** | **% Variability** | | **Corrected item-total correlation** | | **Correlation with other attributes** | | | **Alpha without the item** |  | |
| --- | --- | --- | --- | --- | --- | --- | --- | --- | --- | --- | --- | --- | --- | --- | --- | --- | --- | --- |
| **H11.** | Prevención de caídas | 2,26 | 1,50 | 1,50 | 29,32 | 65,41 | 3,62 | 0,60 | 40,0 | | 0,67 | | I(a=0,42) | | | 0,92 |  | |
| **H12.** | Prevención de la osteoporosis | 0,00 | 0,00 | 1,50 | 32,33 | 66,17 | 3,65 | 0,51 | 34,0 | | 0,71 | | I(a=0,50) | | | 0,92 |  | |
| **H13.** | Atención a los problemas habituales de la menstruación y la menopausia | 1,50 | 0,00 | 3,01 | 37,59 | 57,89 | 3,56 | 0,56 | 37,3 | | 0,62 | | I(a=0,46) | | | 0,93 |  | |
| **¿Los temas siguientes, referidos a los niños, se hablan con los niños y los padres/ tutores?** | | | | | | | | | | | | | | | | | | |
| **H14.** | Maneras de afrontar los problemas de conducta del niño /a | 0,00 | 0,00 | 0,75 | 29,32 | 69,92 | 3,69 | 0,48 | 32,0 | | 0,60 | | - | | | 0,93 |  | |
| **H15.** | Cambios en el crecimiento y conducta que los padres pueden esperar a ciertas edades | 0,00 | 0,00 | 0,75 | 26,32 | 72,93 | 3,72 | 0,47 | 31,3 | | 0,61 | | D(a=0,41) | | | 0,93 |  | |
| **H16.** | **Temas de seguridad para niños menores de 6 años:** cruzar la calle de forma segura y utilizar las sillitas de seguridad en el coche | 0,00 | 1,50 | 4,51 | 30,08 | 63,91 | 3,56 | 0,66 | 44,0 | | 0,70 | | - | | | 0,92 |  | |
| **H17.** | **Temas de seguridad para niños de entre 6 y 12 años:** utilizar el cinturón de seguridad y el casco para la bici | 1,50 | 1,50 | 4,51 | 33,08 | 59,40 | 3,53 | 0,66 | 44,0 | | 0,66 | | - | | | 0,92 |  | |
| **H18.** | **Temas de seguridad para niños mayores de 12 años:** sexo seguro, decir no a las drogas y no beber si se ha de conducir | 0,75 | 0,75 | 3,01 | 25,56 | 69,92 | 3,66 | 0,58 | 38,7 | | 0,70 | | I(a=0,42) | | | 0,92 |  | |
|  | ENFOQUE FAMILIAR / FAMILY FOCUS |  |  |  |  |  |  |  | |  | |  | |  |  | | |  |
| **I1.** | ¿Los profesionales de su EAP preguntan a los pacientes sobre sus ideas y opiniones cuando planifican el tratamiento o cuidados para el paciente o un miembro de su familia? | 1,50 | 0,75 | 6,77 | 62,41 | 28,57 | 3,21 | 0,59 | | 39,3 | | 0,51 | | J(a=0,44) | 0,94 | | |  |
| **I2.** | ¿Los profesionales de su EAP preguntan a los pacientes sobre las enfermedades o problemas que puedan tener sus familiares? | 0,75 | 0,00 | 6,02 | 51,88 | 41,35 | 3,36 | 0,59 | | 39,3 | | 0,54 | | - | 0,94 | | |  |
| **I3.** | ¿Los médicos de su EAP pueden y están dispuestos a encontrarse con los miembros de la familia para hablar de un problema de salud o familiar? | 0,00 | 0,00 | 3,76 | 40,60 | 55,64 | 3,52 | 0,57 | | 38,0 | | 0,54 | | D(a=0,43) E(a=0,45) J(a=0,48) | 0,94 | | |  |
|  | **¿ Los siguientes puntos forman parte de la rutina en la evaluación de la salud, por parte de la mayoría de profesionales de su EAP?** |  |  |  |  |  |  |  | |  | |  | |  |  | | |  |
| **I4.** | Uso de genogramas o cuestionario APGAR familiar | 1,50 | 11,28 | 46,62 | 30,08 | 10,53 | 2,40 | 0,83 | | 55,3 | | 0,45 | | - | 0,94 | | |  |
| **I5.** | Conversación sobre los factores de riesgo familiares relacionados con la salud (p. ej., genética) | 1,50 | 0,00 | 15,79 | 52,63 | 30,08 | 3,15 | 0,67 | | 44,7 | | 0,58 | | D(a=0,44) J(a=0,42) | 0,93 | | |  |
| **I6.** | Conversación sobre los recursos económicos de la familia | 1,50 | 0,75 | 42,11 | 42,11 | 13,53 | 2,69 | 0,71 | | 47,3 | | 0,72 | | H(a=0,47) | 0,93 | | |  |
| **I7.** | Conversación sobre los factores de riesgo sociales (p. ej., pérdida del empleo) | 0,75 | 0,75 | 20,30 | 54,14 | 24,06 | 3,02 | 0,69 | | 46,0 | | 0,81 | | D(a=0,43) H(a=0,51) J(a=0,49) | 0,93 | | |  |
| **I8.** | Conversación sobre las condiciones materiales de vida (por ejemplo, equipamiento básico del hogar, transporte, etc.) | 3,76 | 3,01 | 32,33 | 46,62 | 14,29 | 2,75 | 0,74 | | 49,3 | | 0,75 | | H(a=0,46) J(a=0,42) | 0,93 | | |  |
| **I9.** | Conversación sobre el estado de salud de otros miembros de la familia | 0,00 | 0,75 | 16,54 | 54,14 | 28,57 | 3,11 | 0,69 | | 46,0 | | 0,80 | | D(a=0,45) J(a=0,48) | 0,93 | | |  |

|  | **Item** | **Non- response**  **(%)** | **No, en absoluto**  *Definitely not*  **(%)** | **Es probable que no**  *Probably not*  **(%)** | **Es probable que sí**  *Probably yes*  **(%)** | **Si, sin duda**  *Yes, absolutely*  **(%)** | **Mean** | **SD** | **% Variability** | **Corrected item-total correlation** | **Correlation with other attributes** | **Alpha without the item** |  |
| --- | --- | --- | --- | --- | --- | --- | --- | --- | --- | --- | --- | --- | --- |
|  | **¿ Los siguientes puntos forman parte de la rutina en la evaluación de la salud, por parte de la mayoría de profesionales de su EAP?** |  |  |  |  |  |  |  |  |  |  |  |  |
| **I4.** | Uso de genogramas o cuestionario APGAR familiar | 1,50 | 11,28 | 46,62 | 30,08 | 10,53 | 2,40 | 0,83 | 55,3 | 0,45 | - | 0,94 |  |
| **I5.** | Conversación sobre los factores de riesgo familiares relacionados con la salud (p. ej., genética) | 1,50 | 0,00 | 15,79 | 52,63 | 30,08 | 3,15 | 0,67 | 44,7 | 0,58 | D(a=0,44) J(a=0,42) | 0,93 |  |
| **I6.** | Conversación sobre los recursos económicos de la familia | 1,50 | 0,75 | 42,11 | 42,11 | 13,53 | 2,69 | 0,71 | 47,3 | 0,72 | H(a=0,47) | 0,93 |  |
| **I7.** | Conversación sobre los factores de riesgo sociales (p. ej., pérdida del empleo) | 0,75 | 0,75 | 20,30 | 54,14 | 24,06 | 3,02 | 0,69 | 46,0 | 0,81 | D(a=0,43) H(a=0,51) J(a=0,49) | 0,93 |  |
| **I8.** | Conversación sobre las condiciones materiales de vida (por ejemplo, equipamiento básico del hogar, transporte, etc.) | 3,76 | 3,01 | 32,33 | 46,62 | 14,29 | 2,75 | 0,74 | 49,3 | 0,75 | H(a=0,46) J(a=0,42) | 0,93 |  |
| **I9.** | Conversación sobre el estado de salud de otros miembros de la familia | 0,00 | 0,75 | 16,54 | 54,14 | 28,57 | 3,11 | 0,69 | 46,0 | 0,80 | D(a=0,45) J(a=0,48) | 0,93 |  |
| **I10.** | Conversación sobre la crianza de los hijos | 2,26 | 0,00 | 21,05 | 48,87 | 27,82 | 3,07 | 0,71 | 47,3 | 0,74 | - | 0,93 |  |
| **I11.** | Evaluación de signos de malos tratos a menores | 1,50 | 0,75 | 3,76 | 38,35 | 55,64 | 3,51 | 0,61 | 40,7 | 0,75 | E(a=0,45) J(a=0,44) | 0,93 |  |
| **I11n1** | Evaluación de indicios de maltrato a mujeres | 0,75 | 0,75 | 6,02 | 43,61 | 48,87 | 3,42 | 0,64 | 42,7 | 0,76 | D(a=0,45) J(a=0,47) | 0,93 |  |
| **I11n2** | Evaluación de indicios de maltrato a ancianos | 0,75 | 0,75 | 6,02 | 42,86 | 49,62 | 3,42 | 0,64 | 42,7 | 0,77 | D(a=0,0,42) H(a=0,45) J(a=0,42) | 0,93 |  |
| **I12.** | Evaluación de indicios de crisis familiar | 2,26 | 1,50 | 23,31 | 50,38 | 22,56 | 2,96 | 0,73 | 48,7 | 0,71 | H(a=0,47) J(a=0,47) | 0,93 |  |
| **I13.** | Evaluación del impacto de la salud del paciente en el funcionamiento de la familia | 1,50 | 1,50 | 20,30 | 48,12 | 28,57 | 3,05 | 0,75 | 50,0 | 0,78 | D(a=0,47) E(a=0,41) G(a=0,44) H(a=0,56) J(a=0,55) | 0,93 | |
| **I14.** | Evaluación del desarrollo infantil | 1,50 | 0,00 | 1,50 | 30,83 | 66,17 | 3,66 | 0,51 | 34,0 | 0,52 | J(a=0,42) | 0,94 | |
|  | ORIENTACIÓN COMUNITARIA / COMMUNITY ORIENTATION |  |  |  |  |  |  |  | 0,0 |  |  |  | |
| **J1.** | ¿Los médicos de su EAP hacen visitas a domicilio para cualquier tipo de paciente siempre que estos lo soliciten? | 0,75 | 0,00 | 3,01 | 35,34 | 60,90 | 3,58 | 0,55 | 36,7 | 0,20 | - | 0,90 | |
| **J1n.** | ¿Los médicos de su EAP hacen actividades de grupo fuera del centro (por ejemplo, hogares de ancianos, escuelas, centros cívicos, etc.)? | 0,75 | 0,75 | 11,28 | 27,82 | 59,40 | 3,47 | 0,73 | 48,7 | 0,39 | I(a=0,41) | 0,90 | |
| **J2.** | ¿Cree usted que los médicos de su EAP tienen un conocimiento adecuado sobre los problemas de salud de las comunidades que atienden? | 1,50 | 0,00 | 15,79 | 42,11 | 40,60 | 3,25 | 0,72 | 48,0 | 0,47 | I(a=0,47) | 0,90 | |

|  | **Item** | **Non- response**  **(%)** | **No, en absoluto**  *Definitely not*  **(%)** | **Es probable que no**  *Probably not*  **(%)** | **Es probable que sí**  *Probably yes*  **(%)** | **Si, sin duda**  *Yes, absolutely*  **(%)** | **Mean** | **SD** | **% Variability** | **Corrected item-total correlation** | **Correlation with other attributes** | **Alpha without the item** |
| --- | --- | --- | --- | --- | --- | --- | --- | --- | --- | --- | --- | --- |
| **J3.** | ¿Los médicos de su EAP aceptan opiniones e ideas de la población que les pueden ayudar a ofrecer una mejor atención sanitaria? | 1,50 | 0,00 | 5,26 | 51,88 | 41,35 | 3,37 | 0,58 | 38,7 | 0,52 | G(a=0,42) H(a=0,43) I(a=0,56) K(a=0,45) | 0,90 |
| **J4.** | ¿Su EAP tiene capacidad para adaptar los programas o servicios de atención sanitaria para responder a problemas de salud específicos de la comunidad? | 0,75 | 0,75 | 8,27 | 48,12 | 42,11 | 3,33 | 0,66 | 44,0 | 0,50 | I(a=0,47) K(a=0,44) | 0,90 |
|  | **¿Su EAP utiliza los siguientes tipos de datos para determinar qué programas o servicios necesitan las comunidades que atiende?** |  |  |  |  |  |  |  |  |  |  |  |
| **J5.** | Datos de mortalidad | 0,00 | 18,80 | 39,10 | 20,30 | 20,30 | 2,43 | 1,02 | 68,0 | 0,56 | - | 0,90 |
| **J6.** | Datos sobre enfermedades transmisibles (p. ej. enfermedades de transmisión sexual, tuberculosis) | 1,50 | 11,28 | 30,83 | 31,58 | 24,06 | 2,70 | 0,97 | 64,7 | 0,64 | - | 0,90 |
| **J7.** | Datos de coberturas vacunales | 2,26 | 0,00 | 2,26 | 27,82 | 69,17 | 3,67 | 0,52 | 34,7 | 0,44 | - | 0,90 |
| **J8.** | Datos de riesgos sanitarios y laborales | 0,75 | 7,52 | 25,56 | 38,35 | 25,56 | 2,84 | 0,91 | 60,7 | 0,54 | - | 0,90 |
| **J9.** | Datos obtenidos de las historias clínicas de su centro | 3,01 | 0,75 | 3,76 | 28,57 | 61,65 | 3,60 | 0,61 | 40,7 | 0,44 | - | 0,90 |
|  | **¿Su EAP utiliza los siguientes medios para monitorizar y /o evaluar la efectividad de los servicios / programas** |  |  |  |  |  |  |  |  |  |  |  |
| **J11.** | Encuestas a sus pacientes | 5,26 | 14,29 | 19,55 | 27,82 | 38,35 | 2,90 | 1,07 | 71,3 | 0,52 | - | 0,90 |
| **J12.** | Encuestas a la comunidad | 0,00 | 19,55 | 26,32 | 33,08 | 18,80 | 2,52 | 1,02 | 68,0 | 0,51 | - | 0,90 |
| **J13.** | Opinión de las organizaciones o de los órganos consultivos de la comunidad | 0,00 | 10,53 | 22,56 | 37,59 | 27,07 | 2,83 | 0,96 | 64,0 | 0,65 | I(a=0,42) | 0,90 |
| **J14.** | Opinión del personal del centro | 2,26 | 2,26 | 2,26 | 41,35 | 54,14 | 3,47 | 0,66 | 44,0 | 0,59 | - | 0,90 |
| **J15.** | Análisis de datos locales o estadísticas vitales (mortalidad, nacimientos, prevalencias, etc.) | 2,26 | 9,77 | 23,31 | 32,33 | 30,83 | 2,88 | 0,98 | 65,3 | 0,65 | - | 0,90 |
| **J16.** | Evaluaciones sistemáticas de los programas y servicios de su centro | 0,00 | 2,26 | 13,53 | 35,34 | 47,37 | 3,30 | 0,79 | 52,7 | 0,54 | - | 0,90 |
| **J17.** | Información de otros trabajadores sanitarios de la comunidad | 3,76 | 8,27 | 18,05 | 36,84 | 30,83 | 2,96 | 0,94 | 62,7 | 0,62 | - | 0,90 |
| **J18.** | Participación de usuarios en un comité de seguimiento | 1,50 | 41,35 | 26,32 | 15,79 | 10,53 | 1,95 | 1,03 | 68,7 | 0,52 | I(a=0,43) K(a=46) | 0,90 |
|  | **¿Su EAP utiliza alguna de las siguientes actividades para llegar a los colectivos de la comunidad que atiende?** |  |  |  |  |  |  |  |  |  |  |  |
| **J20.** | Trabajo en red con agencias locales y estatales involucradas con grupos culturalmente diversos | 6,02 | 23,31 | 21,05 | 27,07 | 27,07 | 2,59 | 1,13 | 75,3 | 0,64 | K(a=0,43) | 0,90 |
| **J21.** | Vínculos con organizaciones/ servicios religiosos | 6,02 | 42,11 | 28,57 | 21,05 | 5,26 | 1,89 | 0,93 | 62,0 | 0,48 | - | 0,90 |
| **J22.** | Relación con grupos del barrio o líderes de la comunidad | 0,00 | 13,53 | 18,80 | 33,83 | 33,08 | 2,87 | 1,03 | 68,7 | 0,59 | F(a=0,46) | 0,90 |
| **J23.** | Relación con servicios sociales de la comunidad | 1,50 | 1,50 | 2,26 | 38,35 | 55,64 | 3,52 | 0,63 | 42,0 | 0,40 | - | 0,90 |

|  | **Item** | **Non- response**  **(%)** | **No, en absoluto**  *Definitely not*  **(%)** | **Es probable que no**  *Probably not*  **(%)** | **Es probable que sí**  *Probably yes*  **(%)** | **Si, sin duda**  *Yes, absolutely*  **(%)** | **Mean** | **SD** | **% Variability** | **Corrected item-total correlation** | **Correlation with other attributes** | **Alpha without the item** |
| --- | --- | --- | --- | --- | --- | --- | --- | --- | --- | --- | --- | --- |
|  | COMPETENCIA CULTURAL / CULTURAL COMPETENCE |  |  |  |  |  |  |  |  |  |  |  |
| **K2.** | ¿En su EAP pueden comunicarse con personas que no hablen bien catalán o castellano? | 0,75 | 0,00 | 18,80 | 50,38 | 30,08 | 3,11 | 0,70 | 46,7 | 0,43 | - | 0,79 |
| **K3.** | En caso necesario, ¿su EAP tiene en cuenta las creencias de una familia relativas a la atención sanitaria o al uso de medicina tradicional, como por ejemplo la atención por un “curandero”, o el uso de remedios caseros, fitoterapia, etc.? | 3,76 | 1,50 | 11,28 | 63,16 | 20,30 | 3,06 | 0,62 | 41,3 | 0,30 | - | 0,80 |
| **K4.** | En caso necesario, ¿su EAP tiene en cuenta la intención de una familia de usar un tratamiento alternativo, como por ejemplo homeopatía o acupuntura? | 3,01 | 0,00 | 7,52 | 62,41 | 27,07 | 3,20 | 0,56 | 37,3 | 0,38 | - | 0,80 |
|  | **¿Su EAP utiliza alguno de los siguientes medios para abordar la diversidad cultural?** |  |  |  |  |  |  |  |  |  |  |  |
| **K5.** | Formación del personal por parte de profesores externos | 2,26 | 18,05 | 18,05 | 35,34 | 26,32 | 2,72 | 1,06 | 70,7 | 0,46 | - | 0,79 |
| **K6.** | Programas de capacitación impartidos por el personal del centro | 3,01 | 27,82 | 32,33 | 18,05 | 18,80 | 2,29 | 1,08 | 72,0 | 0,56 | J(a=0,47) | 0,78 |
| **K7.** | Utilización de materiales o folletos que reflejen las diferencias culturales (lengua, imágenes visuales, costumbres religiosas) | 3,76 | 8,27 | 24,81 | 46,62 | 16,54 | 2,74 | 0,84 | 56,0 | 0,62 | J(a=0,45) | 0,77 |
| **K8.** | Personal que refleje la diversidad cultural de la población que atiende | 2,26 | 45,86 | 30,08 | 13,53 | 8,27 | 1,84 | 0,96 | 64,0 | 0,56 | - | 0,78 |
| **K9.** | Traductores / intérpretes / mediadores | 3,76 | 35,34 | 15,79 | 23,31 | 21,80 | 2,33 | 1,19 | 79,3 | 0,55 | - | 0,78 |
| **K10.** | Planificación de servicios adecuada a la diversidad cultural | 2,26 | 30,08 | 36,09 | 20,30 | 11,28 | 2,13 | 0,98 | 65,3 | 0,64 | J(a=0,49) | 0,76 |
